# Supplementary material
Source: publisher site journal article supplement (https://www.dovepress.com/article/294993)
Supplement: Supplementary file 1 [file get_supplementary_file.php]

**Supplementary figure 1** Representative IHC images (100×)

**Supplementary figure 2** (A) GO analysis of differentially mutant genes between low and high TMB group; (B) KEGG analysis of differentially mutant genes between low and high TMB group

**Supplementary figure 3** Differentially mutated genes between *EGFR* mutated and wild-type patients. (A) The mutational frequency of *KRAS* in *EGFR* mutated and wild-type patients; (B) The mutational frequency of *BRCA2* in *EGFR* mutated and wild-type patients

**Supplementary figure 4** Differentially mutated genes between high TMB+*EGFR*-mutant and low TMB+*EGFR*-mutant patients. (A) The mutational frequency of *BRCA2* in two groups; (B) The mutational frequency of *RBI* in two groups; (C) The mutational frequency of *CDKN2A* in two groups; (D) The mutational frequency of *CYP2D6* in two groups; (E) The mutational frequency of *TP53* in two groups

**Supplementary figure 5** Differentially mutated genes among three immune phenotypes. (A) The mutational frequency of *ALK* in different immune phenotypes; (B) The mutational frequency of *CDKN2A* in different immune phenotypes; (C) The mutational frequency of *IDH2* in different immune phenotypes; (D) The mutational frequency of *MAP2K1* in different immune phenotypes; (E) The mutational frequency of *PTEN* in different immune phenotypes

Supplementary Figure 1

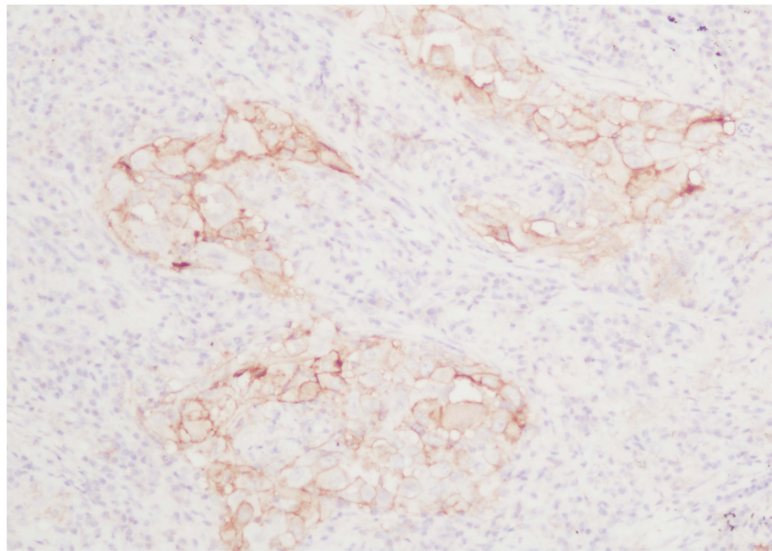

PD-L1 positive

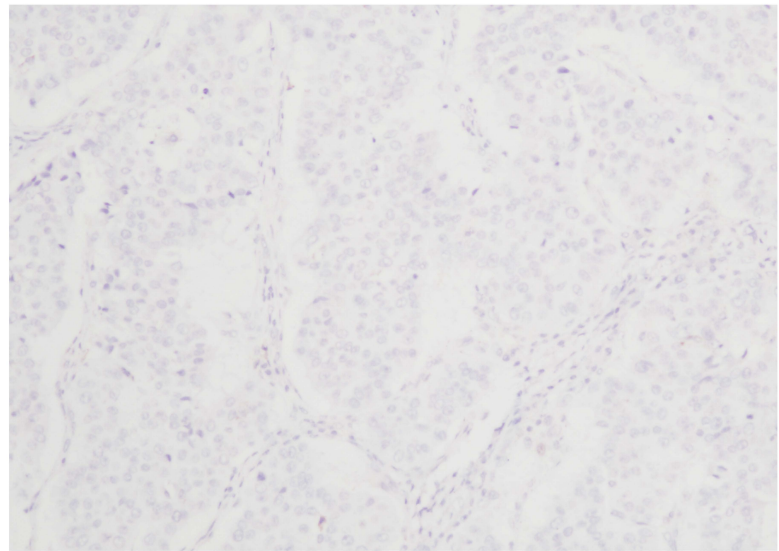

PD-L1 negative

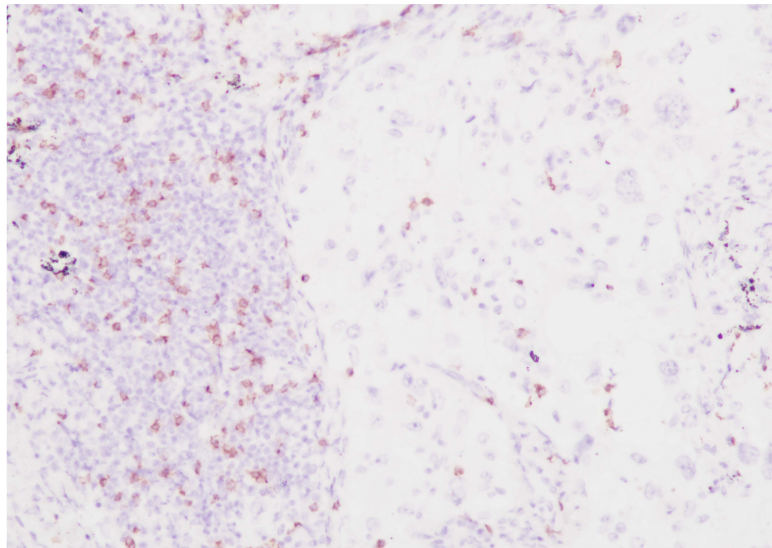

inflamed (CD8)

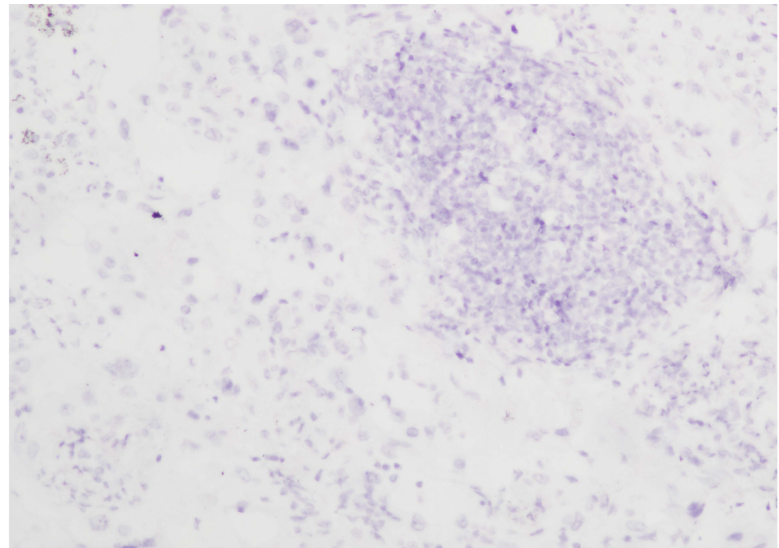

non-inflamed (CD8)

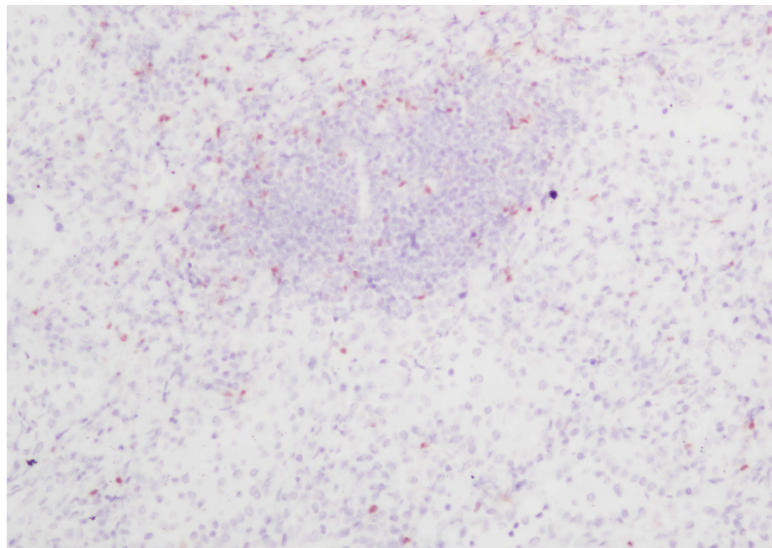

FoxP3 positive

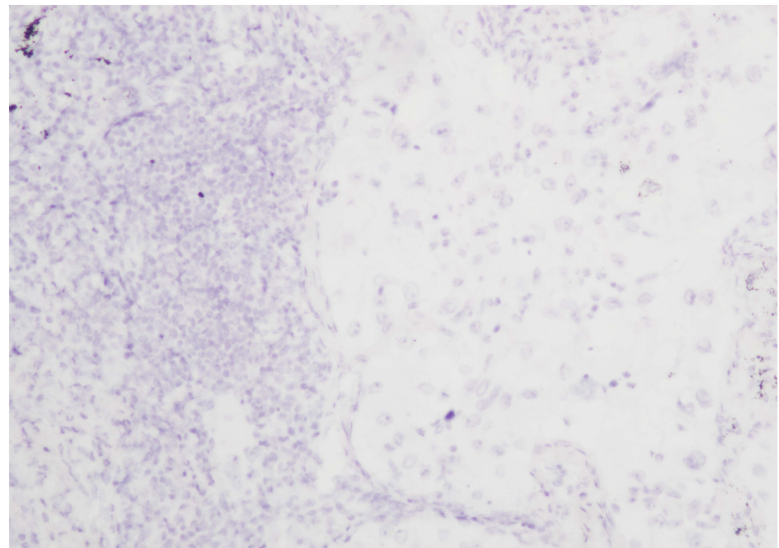

FoxP3 negative

Supplementary Figure 2

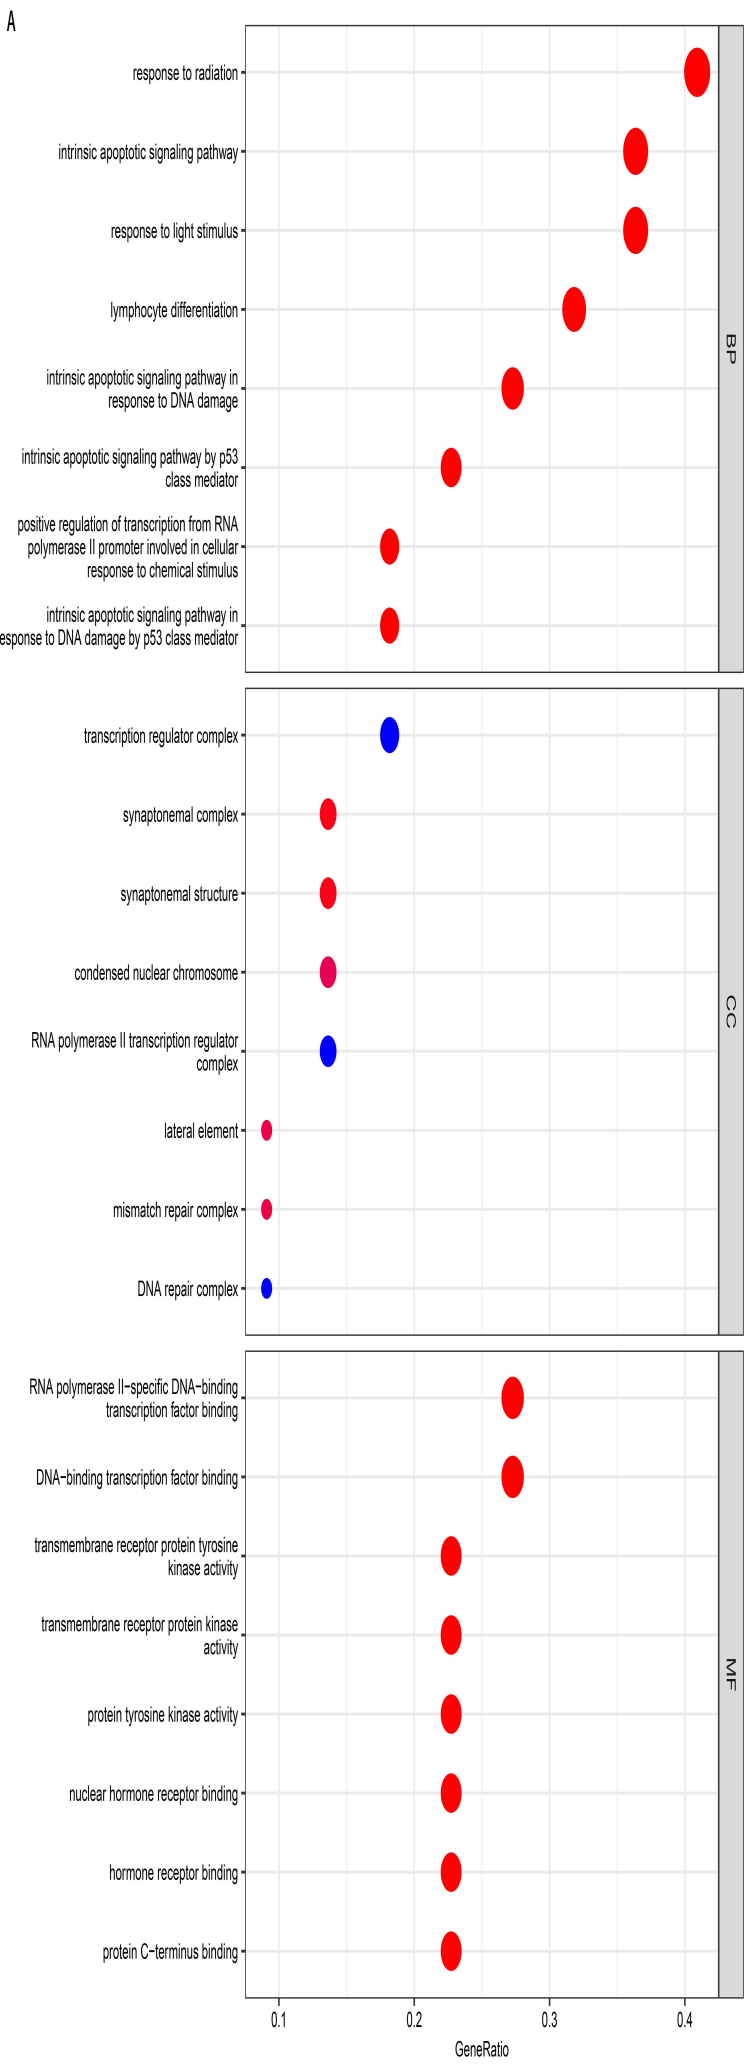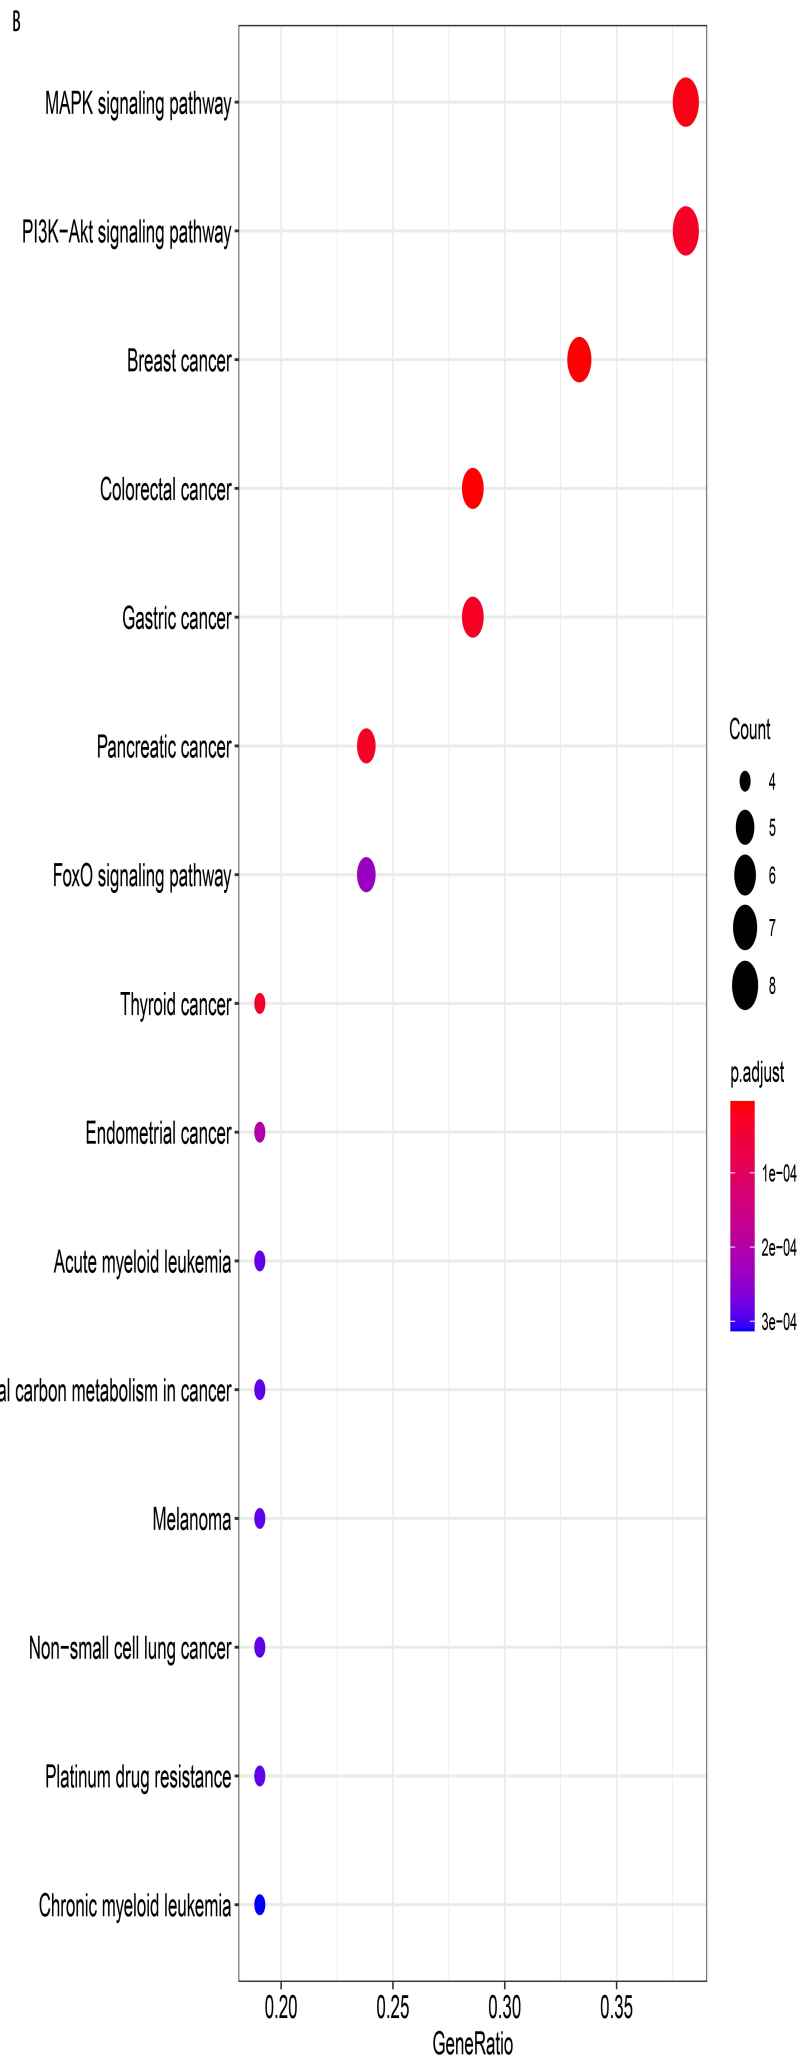

# Supplementary Figure 3

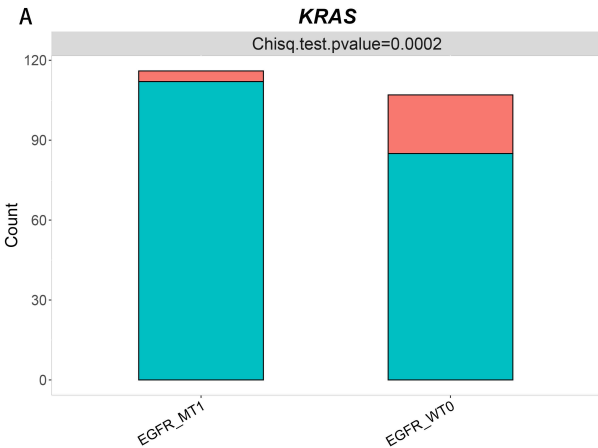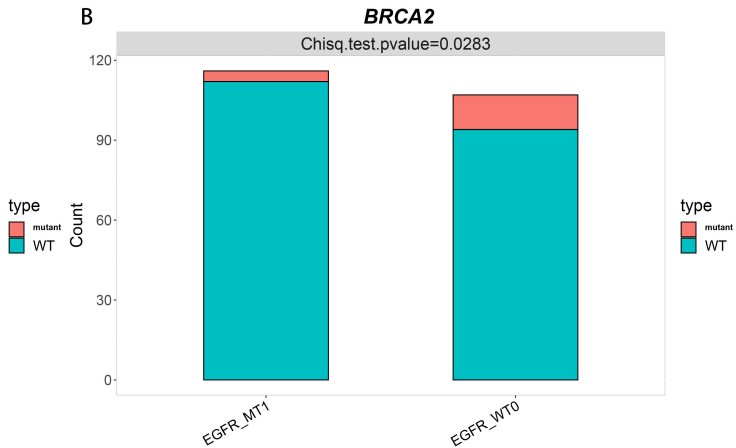

# Supplementary Figure 4

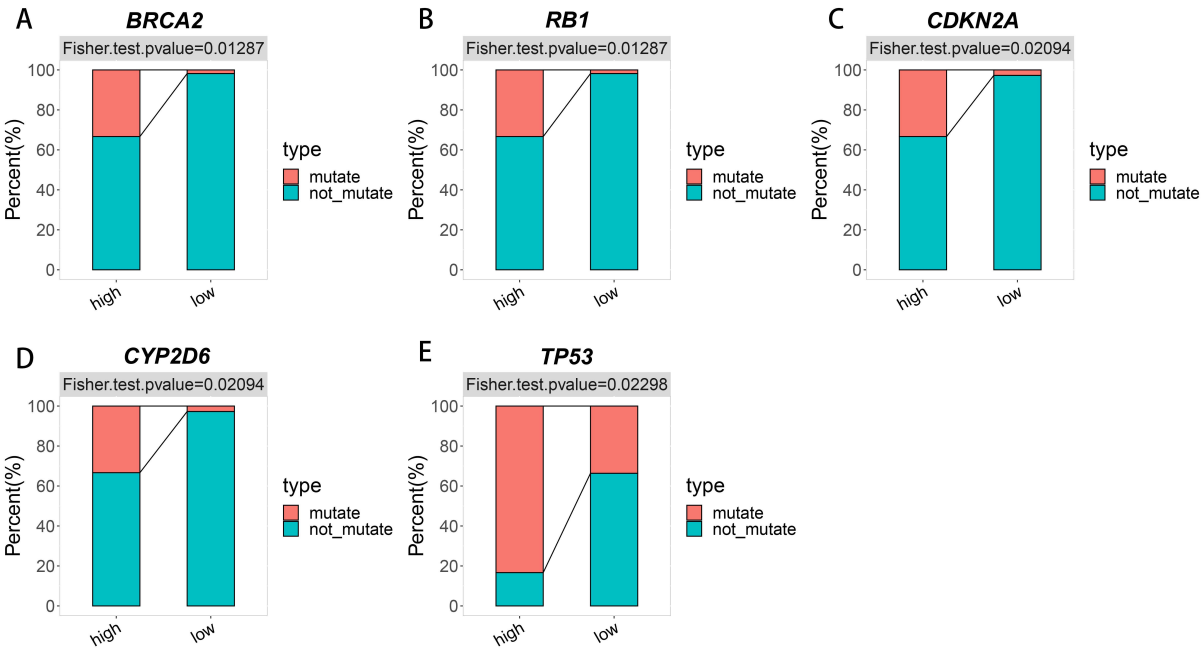

# Supplementary Figure 5

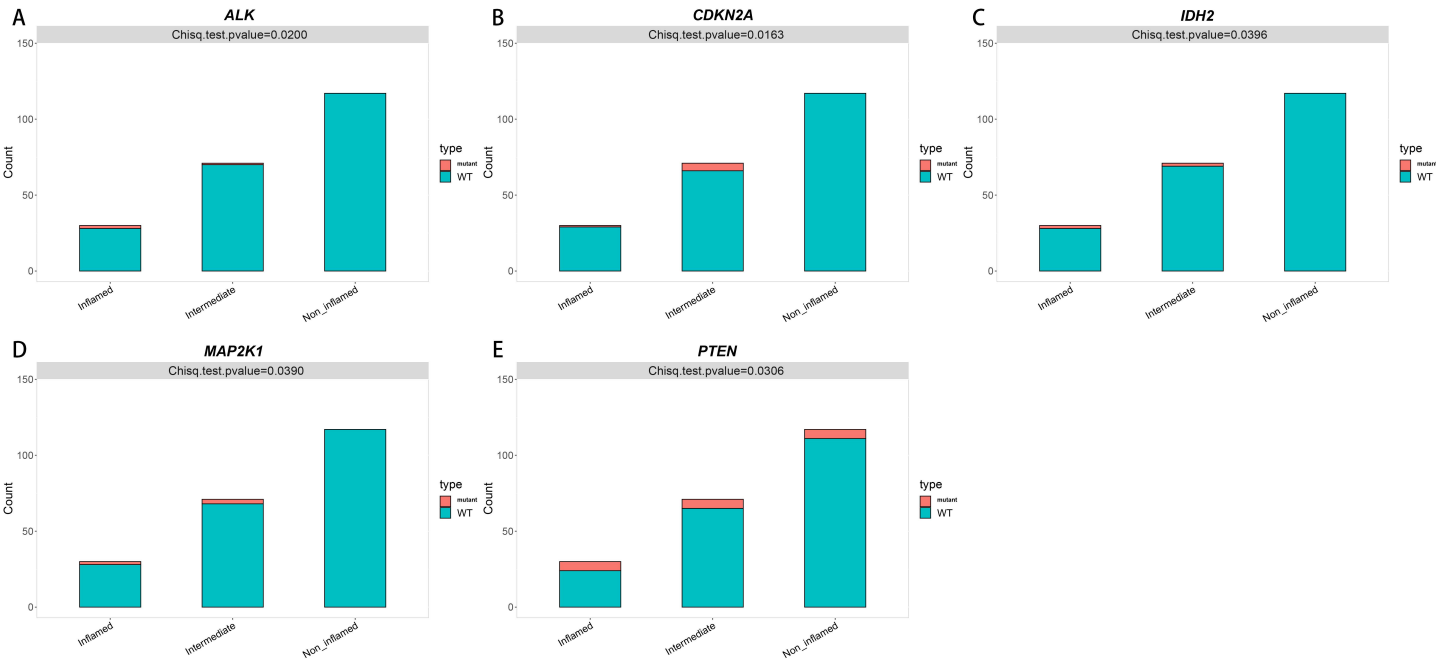

**Supplementary table 1 Comparison of TMB level among different types of EGFR mutation**

| EGFR mutation | TMB level  |          | P value |
|---------------|------------|----------|---------|
|               | Low        | High     |         |
| uncommon      | 7 (100.0%) | 0 (0.0%) | 0.611   |
| 19del         | 54 (96.4%) | 2 (3.6%) |         |
| L858R         | 49 (92.5%) | 4 (7.5%) |         |

**Supplementary table 2 Differentially mutated genes between high and low TMB patients**

| Gene          | mutational frequency |             | P value  |
|---------------|----------------------|-------------|----------|
|               | TMB_high (%)         | TMB_low (%) |          |
| <i>TP53</i>   | 85.71                | 27.23       | 2.11E-07 |
| <i>FLT3</i>   | 19.05                | 0           | 5.97E-05 |
| <i>BRCA2</i>  | 33.33                | 4.95        | 0.000253 |
| <i>KRAS</i>   | 38.1                 | 8.91        | 0.000854 |
| <i>ALK</i>    | 14.29                | 0.5         | 0.002738 |
| <i>MSH2</i>   | 23.81                | 3.96        | 0.003586 |
| <i>SMAD4</i>  | 33.33                | 9.41        | 0.004936 |
| <i>FGF3</i>   | 14.29                | 0.99        | 0.006426 |
| <i>BRCA1</i>  | 28.57                | 10.4        | 0.007848 |
| <i>EP300</i>  | 9.52                 | 0           | 0.008484 |
| <i>B2M</i>    | 9.52                 | 0           | 0.008484 |
| <i>PPARG</i>  | 9.52                 | 0           | 0.008484 |
| <i>MED12</i>  | 9.52                 | 0           | 0.008484 |
| <i>EPHB1</i>  | 9.52                 | 0           | 0.008484 |
| <i>NFE2L2</i> | 9.52                 | 0           | 0.008484 |
| <i>KIT</i>    | 9.52                 | 0.5         | 0.023993 |
| <i>ERBB3</i>  | 9.52                 | 0.5         | 0.023993 |
| <i>OTOP1</i>  | 9.52                 | 0.5         | 0.023993 |
| <i>MLH1</i>   | 23.81                | 7.43        | 0.027514 |
| <i>STK11</i>  | 9.52                 | 0.99        | 0.045247 |
| <i>NF1</i>    | 9.52                 | 0.99        | 0.045247 |
| <i>BRAF</i>   | 9.52                 | 0.99        | 0.045247 |

**Supplementary table 3 Comparison of immune phenotypes among different types of EGFR mutation**

| EGFR mutation | immune phenotype |              |            | P value |
|---------------|------------------|--------------|------------|---------|
|               | non-inflamed     | intermediate | inflamed   |         |
| uncommon      | 4 (57.1%)        | 3 (42.9%)    | 0 (0.0%)   | 0.812   |
| 19del         | 29 (51.8%)       | 18 (32.1%)   | 9 (16.1%)  |         |
| L858R         | 26 (49.1%)       | 16 (30.2%)   | 11 (20.8%) |         |

**Supplementary table 4 Comparison of Foxp3 expression between EGFR mutated and wild-type**

|                | FoxP3 negative | FoxP3 positive | P value |
|----------------|----------------|----------------|---------|
| EGFR mutant    | 99 (85.3%)     | 17 (14.7%)     | 0.066   |
| EGFR wild-type | 77 (75.5%)     | 25 (24.5%)     |         |
